# Supplementary material for: Clinical decision making in a high-risk primary care environment: a qualitative study in the UK
Source: PubMed Central journal article supplement — BMJ Open. 2012 Feb 8;2(1):e000414. doi: 10.1136/bmjopen-2011-000414 (PMC3330259; doi:10.1136/bmjopen-2011-000414), 2012-02-08
Supplement: bmjopen-2011-000414-s1.pdf [file bmjopen-2011-000414-s1.pdf]

## **Appendix 1.**

### **List of interview questions and their relevance to the theoretical model.**

**Introduction:** *I would like to ask you to tell me about the presentation of two of your most recent cases seen in OOH; one straightforward and the other more difficult and not straightforward. Preferably start with the straightforward case.*

Purpose: to see what characteristic were perceived to make a case straightforward or difficult. How does this dichotomy relate to System 1 and 2. Difficult case should invoke System 2.

**1. In response to presenting features:** to note the timing of the first response and if aspects of the salient features can be recognised. Is this consistent with System 1?

**Q1:** *What was the first thing to pop into your head?*

Clarifying questions if required:

**Q1.1:** *As soon as you saw the patient or heard the presentation, what were the options that you were thinking of?*

**Q1.2:** *When did this happen?*

**Q1.3:** *Where do you think this came from?*

Frequently after any question throughout the interview:

**Q1.4:** Can you elaborate/explain?

**2: Further exploration of the process: is there a framing effect as part of System 1.**

**Q2.1:** *Can you tell me what you did then?*

**Q2.2:** *What was driving your questioning?*

Clarifying questions if required:

**Q2.3:** *And in particular did anything worry you? What was the main thing to rule out (or in)?*

**3. Further exploration of the process: focus on a few critical cues or a deep search?**  
**Did they reflect on the validity of the cues used?** Expect overlap of two systems.

**Q3.1:** *What were the critical cues/cardinal features you were looking for?*

**Q3.2:** *Did you find anything with a high predictive value?*

**4. Prerequisites for closure of diagnostic process: Are there any well defined rules or thresholds they were able to recognise? How much reflection was there?**

**Q4.1:** *Can you try and explain what made you stop the process at this particular stage?*

**Q4.2:** *What did you consider when you decided the action to close (depending on the case discussed?)*

**Q4.3:** *Can you describe how comfortable you were with your decision? Can you give some sort of numerical figure for this, or other way of describing it?*

**Q4.4:** *Can you tell me how safety netting comes into this?*

**5. Trainee take-home messages: may be basis of training program.**

**Q5:** *What sort of message would you like your trainee to take home from this consultation?*

Last two questions at the end of the interview:

**6. Differentiation between straightforward and demanding presentations: to provide indicators for use of System2.**

**Q6:** *Can you explain why you felt that Case 1 was straightforward and Case 2 more demanding or difficult?*

**7. Participants' perceptions of OOH environment: to provide indicators for increased practice risk.** Frequently these comments came up spontaneously.

**Q7:** *How is the OOH environment different from normal practice and how does it impact on your practice?*
