# Supplementary material for: Clinical decision making in a high-risk primary care environment: a qualitative study in the UK
Source: PubMed Central journal article supplement — BMJ Open. 2012 Feb 8;2(1):e000414. doi: 10.1136/bmjopen-2011-000414 (PMC3330259; doi:10.1136/bmjopen-2011-000414), 2012-02-08
Supplement: bmjopen-2011-000414-s2.pdf [file bmjopen-2011-000414-s2.pdf]

**COREQ guidelines table**

| <b>Domain 1:<br/>Research team<br/>and reflexivity</b> |                                             |                                                                                                                                                  | <b>Comment</b>                                |
|--------------------------------------------------------|---------------------------------------------|--------------------------------------------------------------------------------------------------------------------------------------------------|-----------------------------------------------|
| Personal<br>Characteristics                            |                                             |                                                                                                                                                  |                                               |
| 1.                                                     | Interviewer/facilitator                     | Which author/s conducted the interview?                                                                                                          | JB and MB                                     |
| 2.                                                     | Credentials                                 | What were the researcher's credentials? <i>E.g. PhD, MD</i>                                                                                      | FRCPE, MA                                     |
| 3.                                                     | Occupation                                  | What was their occupation at the time of the study?                                                                                              | Research Fellows                              |
| 4.                                                     | Gender                                      | Was the researcher male or female?                                                                                                               | 1 male/1 female                               |
| 5.                                                     | Experience and training                     | What experience or training did the researcher have?                                                                                             | >30 years qualitative research                |
| Relationship<br>with participants                      |                                             |                                                                                                                                                  | Nil                                           |
| 6.                                                     | Relationship<br>established                 | Was a relationship established prior to study commencement?                                                                                      | With some of them                             |
| 7.                                                     | Participant knowledge<br>of the interviewer | What did the participants know about the researcher? <i>e.g. personal goals, reasons for doing the research</i>                                  | Broad outlines given .                        |
| 8.                                                     | Interviewer<br>characteristics              | What characteristics were reported about the interviewer/facilitator? <i>e.g. Bias, assumptions, reasons and interests in the research topic</i> | Reasons for research and interest in training |
| <b>Domain 2: study<br/>design</b>                      |                                             |                                                                                                                                                  |                                               |
| Theoretical<br>framework                               |                                             |                                                                                                                                                  |                                               |

COREQ guidelines table

|                       |                                       |                                                                                                                                                                    |                                                                      |
|-----------------------|---------------------------------------|--------------------------------------------------------------------------------------------------------------------------------------------------------------------|----------------------------------------------------------------------|
| 9.                    | Methodological orientation and Theory | What methodological orientation was stated to underpin the study?<br><i>e.g. grounded theory, discourse analysis, ethnography, phenomenology, content analysis</i> | Content analysis                                                     |
| Participant selection |                                       |                                                                                                                                                                    |                                                                      |
| 10.                   | Sampling                              | How were participants selected?<br><i>e.g. purposive, convenience, consecutive, snowball</i>                                                                       | Convenience                                                          |
| 11.                   | Method of approach                    | How were participants approached? <i>e.g. face-to-face, telephone, mail, email</i>                                                                                 | Email and face-to-face                                               |
| 12.                   | Sample size                           | How many participants were in the study?                                                                                                                           | 21                                                                   |
| 13.                   | Non-participation                     | How many people refused to participate or dropped out? Reasons?                                                                                                    | 66% of those approached not interviewed for lack of time or interest |
| Setting               |                                       |                                                                                                                                                                    |                                                                      |
| 14.                   | Setting of data collection            | Where was the data collected?<br><i>e.g. home, clinic, workplace</i>                                                                                               | Clinic for most, 3 at home                                           |
| 15.                   | Presence of non-participants          | Was anyone else present besides the participants and researchers?                                                                                                  | No                                                                   |
| 16.                   | Description of sample                 | What are the important characteristics of the sample? <i>e.g. demographic data, date</i>                                                                           | All experienced GPs in active clinical practice                      |
| Data collection       |                                       |                                                                                                                                                                    |                                                                      |
| 17.                   | Interview guide                       | Were questions, prompts, guides provided by the authors? Was it pilot tested?                                                                                      | Pilot tested. Semi-structured interview                              |
| 18.                   | Repeat interviews                     | Were repeat interviews carried out? If yes, how many?                                                                                                              | No                                                                   |

**COREQ guidelines table**

|                                        |                                |                                                                                                                                          |                                   |
|----------------------------------------|--------------------------------|------------------------------------------------------------------------------------------------------------------------------------------|-----------------------------------|
| 19.                                    | Audio/visual recording         | Did the research use audio or visual recording to collect the data?                                                                      | Audiotaped                        |
| 20.                                    | Field notes                    | Were field notes made during and/or after the interview or focus group?                                                                  | Yes                               |
| 21.                                    | Duration                       | What was the duration of the interviews or focus group?                                                                                  | 30 minutes                        |
| 22.                                    | Data saturation                | Was data saturation discussed?                                                                                                           | Yes and reached about half way    |
| 23.                                    | Transcripts returned           | Were transcripts returned to participants for comment and/or correction?                                                                 | No                                |
| <b>Domain 3: analysis and findings</b> |                                |                                                                                                                                          |                                   |
| Data analysis                          |                                |                                                                                                                                          |                                   |
| 24.                                    | Number of data coders          | How many data coders coded the data?                                                                                                     | 2                                 |
| 25.                                    | Description of the coding tree | Did authors provide a description of the coding tree?                                                                                    | yes                               |
| 26.                                    | Derivation of themes           | Were themes identified in advance or derived from the data?                                                                              | Both, as we responded to the data |
| 27.                                    | Software                       | What software, if applicable, was used to manage the data?                                                                               | Yes                               |
| 28.                                    | Participant checking           | Did participants provide feedback on the findings?                                                                                       | yes                               |
| Reporting                              |                                |                                                                                                                                          |                                   |
| 29.                                    | Quotations presented           | Were participant quotations presented to illustrate the themes / findings? Was each quotation identified? e.g. <i>participant number</i> | yes                               |

**COREQ guidelines table**

|     |                              |                                                                        |     |
|-----|------------------------------|------------------------------------------------------------------------|-----|
| 30. | Data and findings consistent | Was there consistency between the data presented and the findings?     | yes |
| 31. | Clarity of major themes      | Were major themes clearly presented in the findings?                   | yes |
| 32. | Clarity of minor themes      | Is there a description of diverse cases or discussion of minor themes? | yes |
